# Supplementary material
Source: publisher figshare collection journal article supplement (https://acs.figshare.com/ndownloader/files/4517842)
Supplement: Supplementary file 1 [file 4517842]

**Supplementary material for**

**Electronic Structure of the  $A_8Tr_{11}$  ( $A = K, Rb, Cs$ ;  $Tr = Ga, In, Tl$ )**

**Zintl Phases: Possible Chemical Reasons Behind their Activated vs.  
Non Activated Conductivity**

*Manuel Cobián,<sup>§</sup> Pere Alemany,<sup>‡\*</sup> Alberto García<sup>§</sup> and Enric Canadell<sup>§\*</sup>*

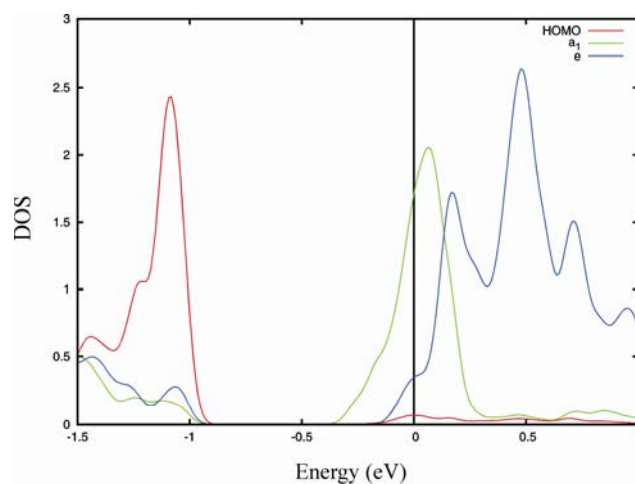

**Figure S1.** Local DOS associated with the HOMO,  $a_1$ - and e-type orbitals of an isolated  $\text{Tl}_{11}^{7-}$  cluster in the DOS of  $\text{Cs}_8\text{Tl}_{11}$  around the Fermi level.

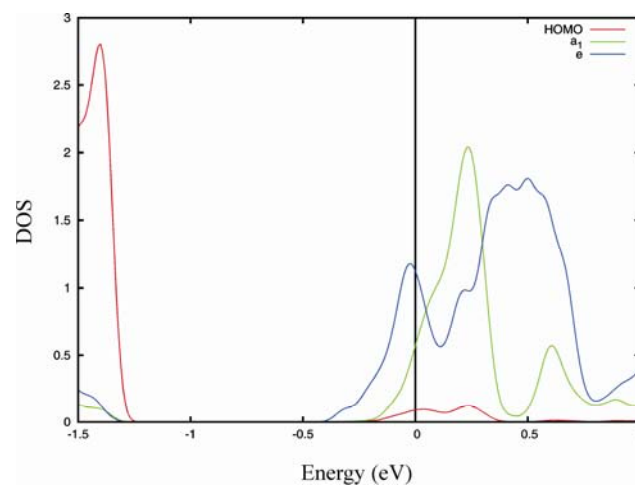

**Figure S2.** Local DOS associated with the HOMO,  $a_1$ - and e-type orbitals of an isolated  $\text{Ga}_{11}^{7-}$  cluster in the DOS of  $\text{Cs}_8\text{Ga}_{11}$  around the Fermi level.
